# Supplementary material for: Regulation of anti-apoptotic signaling by Kruppel-like factors 4 and 5 mediates lapatinib resistance in breast cancer
Source: PubMed Central journal article supplement (PMC4385942; doi:10.1038/cddis.2015.65), 2015-03-19
Supplement: cddis201565x1.pdf [file cddis201565x1.pdf]

**A**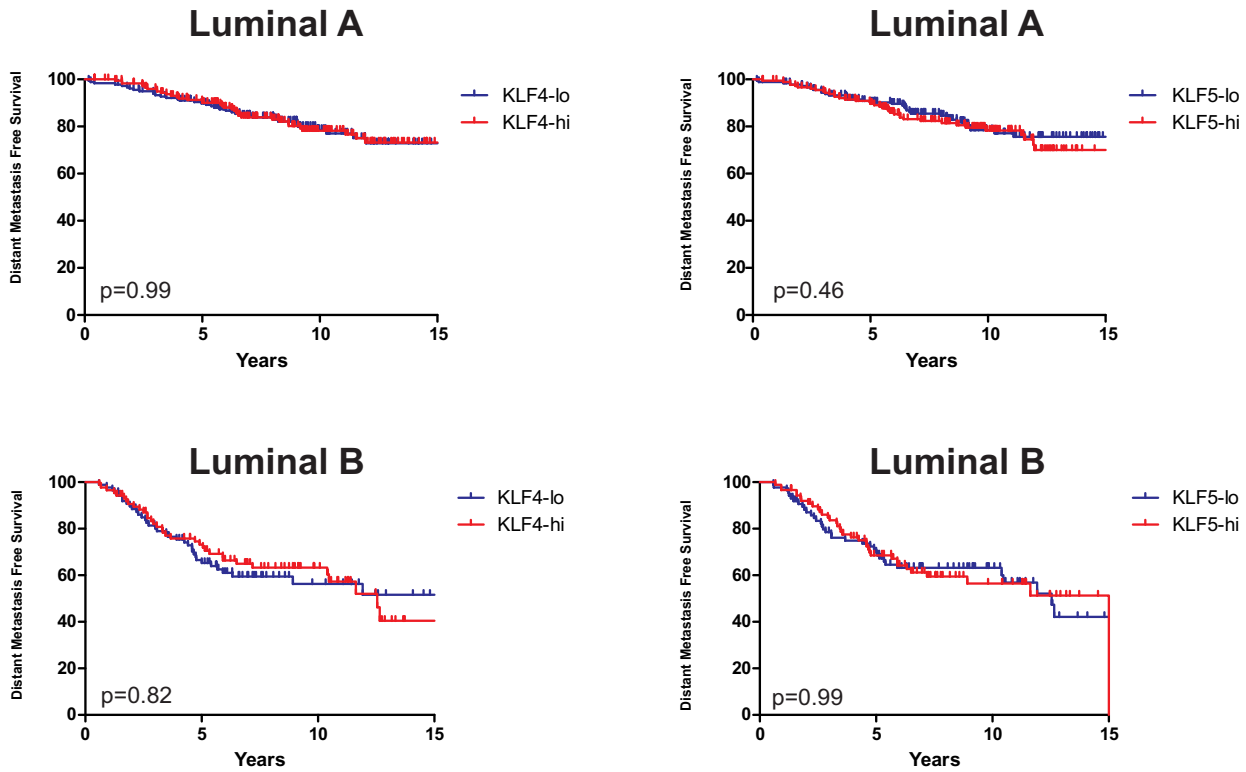**B**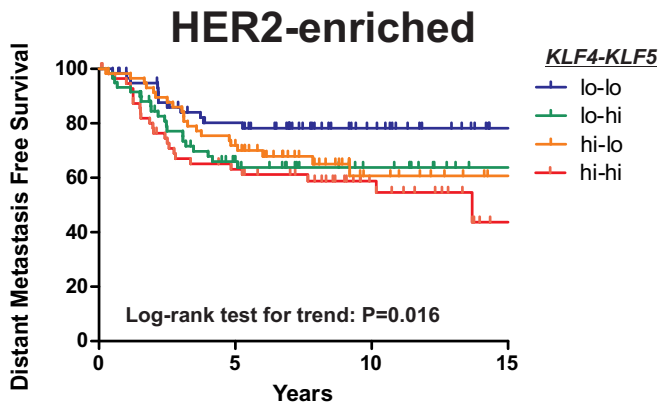

**Supplemental Fig 1. DMFS analysis.** A. Luminal subtype tumors were analyzed. B. The four subgroups of HER2-enriched breast cancers identified by *KLF4* and *KLF5* expression were analyzed. Patients were assigned using median expression of *KLF4* (high or low) and *KLF5* (high or low).
